# Supplementary material for: Differential effects of Foxp2 disruption in distinct motor circuits
Source: PubMed Central journal article supplement (PMC6514880; doi:10.1038/s41380-018-0199-x), 2018-08-14

Control 1

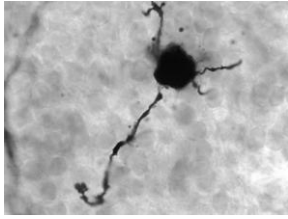

Control 2

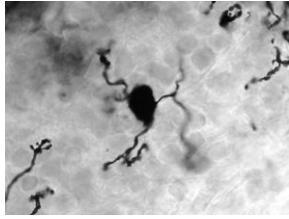

Foxp2-PCKO 1

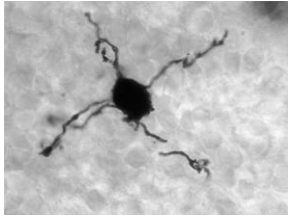

Foxp2-PCKO 2

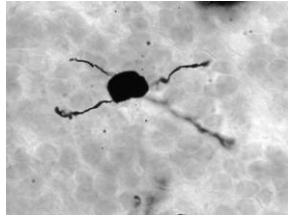

Control

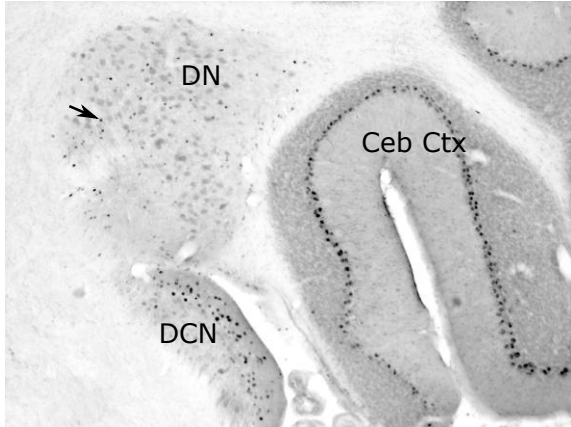

Foxp2-PCKO

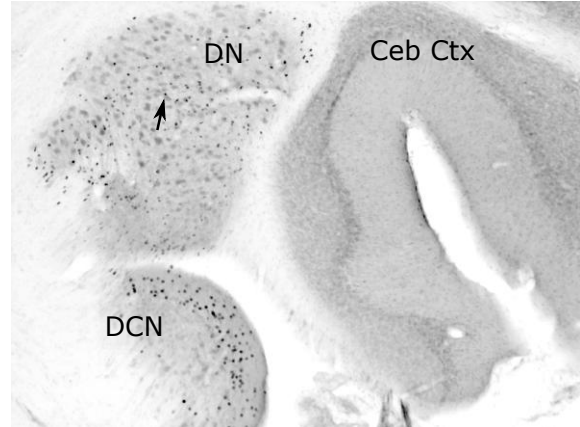

Supplement: 41380_2018_199_MOESM4_ESM.pdf [file 41380_2018_199_MOESM4_ESM.pdf]
